# Supplementary material
Source: ML conference proceedings conference paper supplement (https://openreview.net/forum?id=yXYEbPQp8x)
Supplement: supplementary_material [file raw_results.xlsx]

## Sheet: Sheet1
model	sequence	plddt	helices	bundle	ordered
4o	MAEELAAKQKLEELEKQLEQLEQAVGGGGSAAKQKLEELEKQLEQLEQAVGGGGSAAKQKLEELEKQLEQLEQAVGGGGSAAKQKLEELEKQLEQLEQAV	0.614574	4	n	n
4o	MALIKALEKELAALEKIAAAAGGGGSMALIKALEKELAALEKIAAAAGGGGSMALIKALEKELAALEKIAAAAGGGGSMALIKALEKELAALEKIAAAA	0.627435	4	y	n
4o	MALIQKLEEKLLEIAKELLAAGGGTELIKKLEEKLLKIAKDLLEAGGGTEAIQKLEEKLLEIAKELLAAGGGTELIKKLEEKLLKIAKDLLEA	0.636224	4	y	n
4o	MSNLEIKKLIEELVKIAALGGGSGQLEIRKELLEILKQLVAEGGGSDNLKQIKELLEALKRILEAGGGSEKLQKLEELVEAIEQLVAA	0.636957	4	y	n
4o	MSNLEIKKLIEELVKIAALGPGDQLKIRKELLEILKQLVAEGPNDNLEQIKELLEALKRILEAGPGSEKLQKLEELVEAIEQLVAA	0.595639	4	y	n
o4-mini-high	MLAQIEAKLAQIEAKLAQIEAKLAQIEAKGSGSLAQIEAKLAQIEAKLAQIEAKLAQIEAKGSGSLAQIEAKLAQIEAKLAQIEAKLAQIEAKGSGSLAQIEAKLAQIEAKLAQIEAKLAQIEAK	0.923474	1	n	n
o4-mini-high	EIAALEAKNAALKAEIAALEAKNAALKGPGTGELAAEAEQLARLEELVEEALEQLARELGPGTGEIAALEAKNAALKAEIAALEAKNAALKGPGTGELAAEAEQLARLEELVEEALEQLAREL	0.567106	4	n	n
o4-mini-high	NEIAALEAKNAALKAEIAALEAKNAALKDSGSGNELKALEEAQLKAQELEAQLKAQELEAQDDSGSGNEIAALEAKNAALKAEIAALEAKNAALKDSGSGNELKALEEAQLKAQELEAQLKAQELEAQDD	0.575145	4	n	n
o4-mini-high	CEAIALKFEAIALKFEAIALKFEAIALKFEAIALKSGSGIQELKQEIQELKQEIQELKQEIQELKQEIQELKQESGSGCEAIALKFEAIALKFEAIALKFEAIALKFEAIALKSGSGIQELKQEIQELKQEIQELKQEIQELKQEIQELKQE	0.506488	4	n	n
o4-mini-high	NCEAIALKFEAIALKFEAIALKFEAIALKFEAIALKDDPPTCNIQELKQEIQELKQEIQELKQEIQELKQEIQELKQEDDDPPTNCEAIALKFEAIALKFEAIALKFEAIALKFEAIALKDDPPTCNIQELKQEIQELKQEIQELKQEIQELKQEIQELKQEDD	0.61045	4	y	n
o3	LKALEKELKALEKELKALEKELKALEKEGGPGSIKALEQKIKALEQKIKALEQKIKALEQKGGTGSLKALEKELKALEKELKALEKELKALEKEGGAGTIKALEQKIKALEQKIKALEQKIKALEQK	0.688209	4	n	n
o3	LKALEKLKALEKLKALEKLKALEKLGGPGSIQALERIQALERIQALERIQALERIQGGPGSLKALEELKALEELKALEELKALEELGGPGSVQALDKVQALDKVQALDKVQALDKVQ	0.560956	4	n	n
o3	MQEERKKLLEKLEKILDEVTDGAPDEARERIEKLAKDVKDELEEGDAKNMIEKFRDEMEQMYKDAPNAVMEQLLEEIEKLLKKA	0.763461	4	y	n
o3	MAEAAEKLKEALKEALKEAGGGSAEAAEKLKEALKEALKEAGGGSAEAAEKLKEALKEALKEAGGGSAEAAEKLKEALKEALKEA	0.698654	4	y	n
o3	MEIAALEKEIAALEKEIAALEKEIAALEKGPGEIAALEKEIAALEKEIAALEKEIAALEKGPGEIAALEKEIAALEKEIAALEKEIAALEKGPGEIAALEKEIAALEKEIAALEKEIAALEK	0.793039	1	n	n
o3	MEIAALEKEIAALEKEIAALEKEIAALEKGGSGGKIAALKEKIAALKEKIAALKEKIAALKEGGSGGEIAALEKEIAALEKEIAALEKEIAALEKGGSGGKIAALKEKIAALKEKIAALKEKIAALKE	0.876245	4	n	y
o3	MLKALEQKLKALEQKLKALEQKGGGSGLKALEQKLKALEQKLKALEQKGGGSGLKALEQKLKALEQKLKALEQKGGGSGLKALEQKLKALEQKLKALEQK	0.792336	4	y	n
o3	TLKQLEAKLKQLEAKLKQLEAKNGGSGTLKQLEAKLKQLEAKLKQLEAKNGGSGTLKQLEAKLKQLEAKLKQLEAKNGGSGTLKQLEAKLKQLEAKLKQLEAKN	0.675197	4	n	n
o3	MLKAIEAKLKAIEAKLKAIEAKGGGSGLKAIEAKLKAIEAKLKAIEAKGGGSGLKAIEAKLKAIEAKLKAIEAKGGGSGLKAIEAKLKAIEAKLKAIEAK	0.665633	4	y	n
o3	MAEELKKLAEELKRLAEELKKLAGGGSGAEELKKLAEELKRLAEELKKLAGGGSGAEELKKLAEELKRLAEELKKLAGGGSGAEELKKLAEELKRLAEELKKLA	0.891322	4	y	n
o3	MIEALAKKIEALAKKIEALAKKIEALAKKGGSGLEALAKKLEALAKKLEALAKKLEALAKKGGSGIEALSKKIEALSKKIEALSKKIEALSKKGGSGLEALSKKLEALSKKLEALSKKLEALSKK	0.800754	4	y	n
o3	LAEIAKELAEIAKELAEIAKELAEIAKEGSGGGLKEIAELLKEIAELLKEIAELLKEIAELGSGGGLAKVAELLAKVAELLAKVAELLAKVAELGSGGGLAEVAKLLAEVAKLLAEVAKLLAEVAKL	0.845218	4	y	n
o3	LKALEEKLKALEEKLKALEEKGPGSIEAIEELIEAIEELIEAIEELGPGSLQKALENLQKALENLQKALENGPGSIEAIEELIEAIEELIEAIEEL	0.811216	4	y	n
o3	LEAIKSELEAIKSELEAIKSEGGGSGGVEALRAEVEALRAEVEALRAEGGGSGGLDAIRNELDAIRNELDAIRNEGGGSGGLEAIKSELEAIKSELEAIKSE	0.843513	4	y	n
o3	EIAALEKEIAALEKEIAALEKGGSGEIAALEKEIAALEKEIAALEKGGSGEIAALEKEIAALEKEIAALEKGGSGEIAALEKEIAALEKEIAALEK	0.866666	1	n	n
o3	EIAALEKEIAALEKEIAALEKGGEIQALEQEIQALEQEIQALEKGGEISALEREISALEREISALERGGEIQALEKEIQALEKEIQALEK	0.775334	2	n	n
4.5	MKALEEKIAKLAEKLAAEIKKAGGGEIAKLAEKIAKLAAEKIGGGEKLAEKIAKLAEKLAAEIKK	0.661305	3	y	n
4.5	MKALEEKIAKLAAEKLAKGGGEIAKKLAEKIAEALGGGKIAEKLAKELAEKLAAGGGEKIAKELAKALAEKLAA	0.622816	4	y	n
4.5	MKALEEKIAKLAAEKLAKGGPEIAKKLAEKIAEALGGPKIAEKLAKELAEKLAAGGPEKIAKELAKALAEKLAA	0.658189	4	y	n
4.5	MKALEEAIKKLAAEKLAKGGPQIAEKLAEKIAEALGGPKLAEKIAKELAAKLAGGPEKLAKEIAKALAEKLAA	0.613866	4	y	n
o4mini	MLEKIKEKLEKIKEKLEKIKEKLEKIKEKLEKIKEKLEKIKEKGGGSGLEKIKEKLEKIKEKLEKIKEKLEKIKEKLEKIKEKGGGSGLEKIKEKLEKIKEKLEKIKEKLEKIKEKLEKIKEKGGGSGLEKIKEKLEKIKEKLEKIKEKLEKIKEKLEKIKEK	0.816416	4	n	n
o4mini	MDLEKIKEKLEKIKENPLEKIKEKLEKIKEKLEKIKEKLEKIKEKGNGSGLEKIKEKLEKIKENPLEKIKEKLEKIKEKLEKIKEKLEKIKEKGNGSGLEKIKEKLEKIKENPLEKIKEKLEKIKEKLEKIKEKLEKIKEKGNGSGLEKIKEKLEKIKENPLEKIKEKLEKIKEKLEKIKEKLEKIKEK	0.582918	4	n	n
o4mini	MDNSLEKIKEKLEKIKENPLEKIKEKLEKIKEKLEKIKEKLEKIEEGNGSGLEKIKEKLEKIKENPLEKIKEKLEKIKEKLEKIKEKLEKIEEGNGSGLEKIKEKLEKIKENPLEKIKEKLEKIKEKLEKIKEKLEKIEEGNGSGLEKIKEKLEKIKENPLEKIKEKLEKIKEKLEKIKEKLEKIEE	0.692464	2	n	n
o4mini	MDNSLEKIKEKLEKIKEKLEKIKEKLEKIKEKEGNGSGLEKIKEKLEKIKEKLEKIKEKLEKIKEKEGNGSGLEKIKEKLEKIKEKLEKIKEKLEKIKEKEGNGSGLEKIKEKLEKIKEKLEKIKEKLEKIKEKE	0.51732	4	n	n
o4mini	MLEKIKEKLEKIKEKLEKIKEKLEKIKEKLEKIKEKLEKIKEKGGGSGLEKIKEKLEKIKEKLEKIKEKLEKIKEKLEKIKEKLEKIKEKGGGSGLEKIKEKLEKIKEKLEKIKEKLEKIKEKLEKIKEKLEKIKEKGGGSGLEKIKEKLEKIKEKLEKIKEKLEKIKEKLEKIKEKLEKIKEK	0.824347	4	y	n
o4mini	MEAAAKELQALEKQALQAELQAELQGGSGEAAAKELQALEKQALQAELQAELQGGSGEAAAKELQALEKQALQAELQAELQGGSGEAAAKELQALEKQALQAELQAELQ	0.597937	4	n	n
o4mini	GEIAALEAKNAALKAEIAALEAKIAALKAEIGGGSGGEIAALEAKNAALKAEIAALEAKIAALKAEIGGGSGGEIAALEAKNAALKAEIAALEAKIAALKAEIGGGSGGEIAALEAKNAALKAEIAALEAKIAALKAEI	0.639036	4	n	n
o4mini	MEIAALEKEIAALEKEIAALEKEIAALEKGGSGGEIAALEKEIAALEKEIAALEKEIAALEKGGSGGEIAALEKEIAALEKEIAALEKEIAALEKGGSGGEIAALEKEIAALEKEIAALEKEIAALEK	0.784232	4	n	n
o4mini	MGLKAIAEKLKAIAEKLKAIAEKLKAIAEKGSGSLKAIAEKLKAIAEKLKAIAEKLKAIAEKGSGSLKAIAEKLKAIAEKLKAIAEKLKAIAEKGSGSLKAIAEKLKAIAEKLKAIAEKLKAIAEK	0.887178	4	y	y
o4mini	EIAALEKEIAALEKEIAALEKEIAALEKGGSGEIAALEKEIAALEKEIAALEKEIAALEKGGSGEIAALEKEIAALEKEIAALEKEIAALEKGGSGEIAALEKEIAALEKEIAALEKEIAALEK	0.869504	1	n	n
